# Supplementary material for: Anti-Inflammatory Effects of Huangqin Decoction on Dextran Sulfate Sodium-Induced Ulcerative Colitis in Mice Through Regulation of the Gut Microbiota and Suppression of the Ras-PI3K-Akt-HIF-1α and NF-κB Pathways
Source: PubMed Central journal article supplement (PMC6984456; doi:10.3389/fphar.2019.01552), 2020-01-20
Supplement: Table_1.pdf [file Table_1.pdf]

Supplemental Table 1: The water intake of mice in each group

| Group             | Water Intake (mL) |      |      |      |      |      |      |
|-------------------|-------------------|------|------|------|------|------|------|
|                   | Day1              | Day2 | Day3 | Day4 | Day5 | Day6 | Day7 |
| Control           | 69.1              | 69.7 | 70.0 | 66.8 | 68.6 | 69.1 | 68.9 |
| DSS               | 69.7              | 69.0 | 69.1 | 63.0 | 64.4 | 63.8 | 62.4 |
| DSS+ME            | 68.6              | 69.5 | 68.3 | 63.0 | 63.0 | 64.9 | 63.7 |
| DSS+2.275g/kg HQD | 69.3              | 69.7 | 68.3 | 65.5 | 64.8 | 65.0 | 64.5 |
| DSS+4.55g/kg HQD  | 68.4              | 69.1 | 69.5 | 68.5 | 67.4 | 68.2 | 67.6 |
| DSS+9.1g/kg HQD   | 68.8              | 69.3 | 67.8 | 68.6 | 67.0 | 68.9 | 68.6 |
